# Supplementary material for: Trans genomic capture and sequencing of primate exomes reveals new targets of positive selection
Source: HighWire-hosted journal article supplement (doi:10.1101/gr.121327.111), 2011-07-27
Supplement: george_supp.pdf [file george_supp.pdf]

## Supplemental Information

### Supplemental Figures

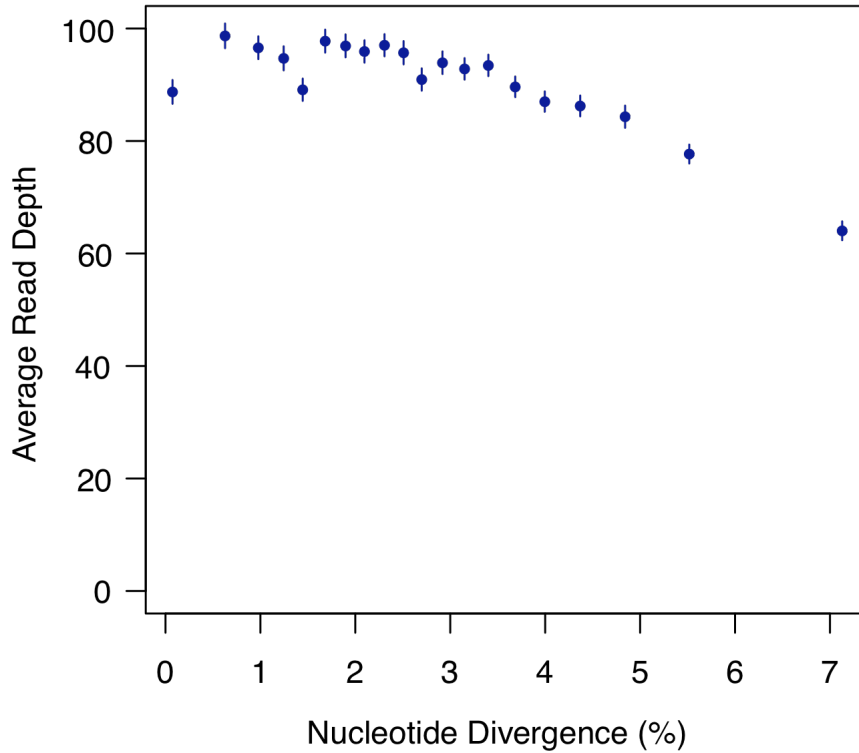

**Figure S1. Average macaque read depth of captured targets versus human-macaque sequence divergence.** We calculated sequence divergence between the human and macaque reference genome for 134,401 orthologous targets, which contained no indels. We placed targets into 20 bins of equal size based on their human-macaque sequence divergence and then calculated the mean macaque read depth of the targets within each bin.

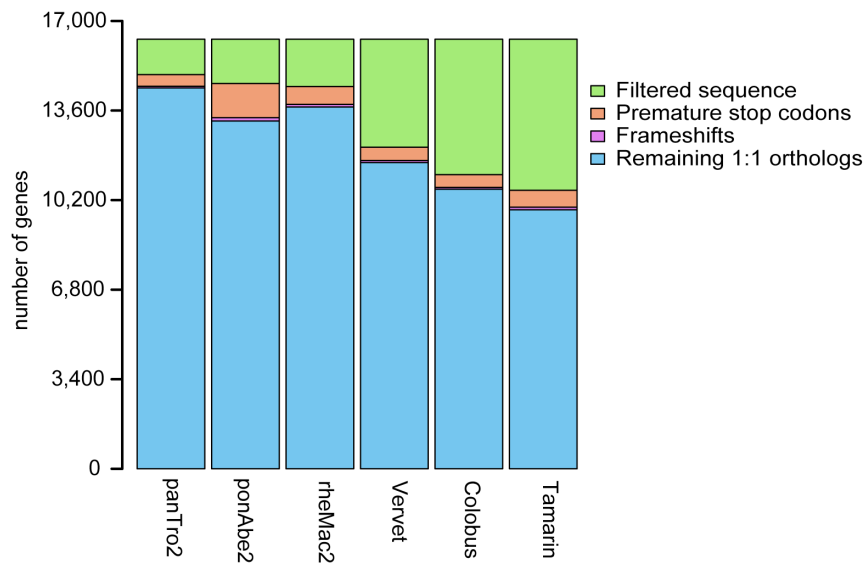

**Figure S2. Filtering of orthologous gene alignments.** This figure is a summary of the ortholog filtering described in the methods.

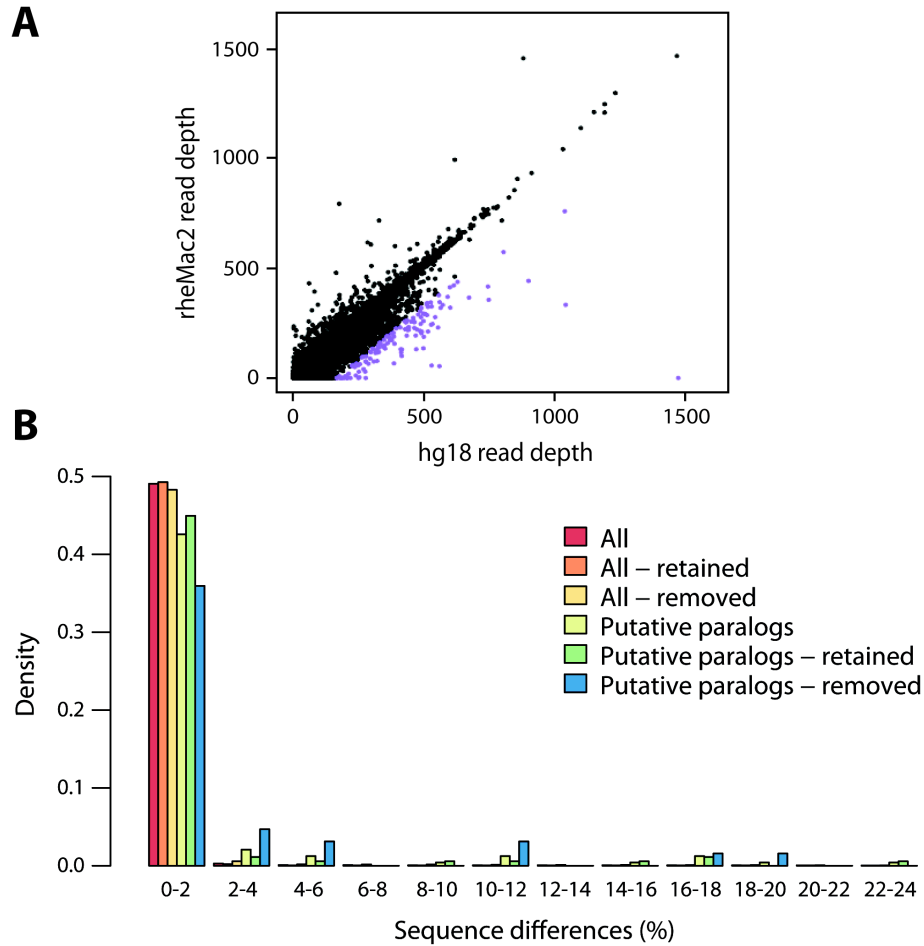

**Figure S3. Identification of putative paralogous targeted regions and sequence differences between assembled and reference macaque sequences.** (A) We identified putative paralogous captured targets that may be susceptible to mis-assembly by comparing the depth of macaque reads mapped to the macaque reference genome (rheMac2) to the depth of the same reads mapped to the human reference genome (hg18). We consider as putative paralogs (purple), the 137 targets where the hg18 read depth is at least two standard deviations greater than the rheMac2 read depth. (B) Histogram of nucleotide differences between the macaque assembled exome and the macaque reference genome for 153,546 targeted regions that we assembled and uniquely mapped to the macaque reference genome using cross\_match (v1.090518, <http://www.phrap.org>). Targets were further categorized by whether they were putative paralogs and by whether

they are retained or removed following filtering for segmental duplications, extreme heterozygosity and missing sequence (see Methods for more details).

## Supplemental Tables

**Table S1. Summary of read merging and mapping.** Summary of read merging and mapping for each non-human primate exome and two human HapMap exomes (Human 1: NA12878 and Human 2: NA18967). Listed for each exome are the number of paired-end 76 bp reads (PE76) generated, the number of overlapping read pairs merged into single longer reads, the number of read pairs discarded due to gaps in the overlapping portion, the total number of individual reads after read merging, the number of individual reads discarded due to low quality (>10% Ns), the number of reads uniquely mapped to the repeat masked human reference genome with cross\_match (v1.090518, <http://www.phrap.org>) and the number of uniquely mapped reads remaining (and used for assembly of exomes) after filtering for PCR and optical duplicates.

| Sample  | PE76 read pairs | Merged PE76 read pairs | Discarded PE76 read pairs | Total individual reads | Discarded low quality | Uniquely mapped | After duplicate filtering |
|---------|-----------------|------------------------|---------------------------|------------------------|-----------------------|-----------------|---------------------------|
| Human 1 | 37,520,750      | 20,945,392             | 142,933                   | 53,810,242             | 628,917               | 47,615,608      | 40,589,744                |
| Human 2 | 47,628,042      | 25,921,661             | 337,984                   | 68,658,455             | 2,821,253             | 52,136,229      | 47,538,474                |
| Macaque | 46,373,786      | 22,949,875             | 356,160                   | 69,085,377             | 929,405               | 55,206,587      | 44,741,572                |
| Vervet  | 47,568,368      | 20,979,776             | 301,513                   | 73,553,934             | 1,300,948             | 57,365,966      | 45,683,191                |
| Colobus | 46,834,936      | 22,969,487             | 357,702                   | 69,984,981             | 1,732,508             | 55,369,898      | 43,484,635                |
| Tamarin | 46,044,421      | 21,469,749             | 390,156                   | 69,838,781             | 1,429,809             | 52,555,753      | 42,067,032                |

**Table S2. Assembly statistics.** Summary of phrap assemblies for each non-human primate exome and two human HapMap exomes (Human 1: NA12878 and Human 2: NA18967). Listed for each exome are the total number of groups of overlapping reads, the number of overlap groups containing more than one read that were assembled using phrap (v1.090518, <http://www.phrap.org>), the number of assembled contigs, the average length of the assembled contigs, the number of assembled contigs that mapped uniquely to the repeat masked human reference genome with cross\_match (v1.090518, <http://www.phrap.org>) and the number of discarded contigs that mapped to a different location than their individual reads (off location contigs).

| Sample  | Overlap groups | Groups assembled | Contigs | Avg. contig length (bp) | Mapped contigs | Off location contigs |
|---------|----------------|------------------|---------|-------------------------|----------------|----------------------|
| Human 1 | 1,988,564      | 660,218          | 590,549 | 214                     | 570,036        | 13,284               |
| Human 2 | 2,644,570      | 981,000          | 902,670 | 170                     | 884,566        | 16,244               |
| Macaque | 1,611,560      | 593,794          | 592,954 | 215                     | 570,219        | 30,016               |
| Vervet  | 1,631,204      | 606,930          | 604,158 | 224                     | 578,120        | 28,221               |
| Colobus | 1,565,107      | 637,026          | 642,079 | 207                     | 617,462        | 29,884               |
| Tamarin | 1,485,380      | 569,441          | 727,059 | 210                     | 684,602        | 33,741               |

**Table S3. Linear regression model of macaque read depth.** To assess what factors influence captured target read depth, we fit a linear model using observations from 128,914 captured target regions. The response variable, macaque read depth, is in units of reads/base.  $R^2 = 0.674$ .

$\beta$  – Slope estimate. Standard errors of the slope estimates are in parentheses.

$\beta^*$  – Normalized slope estimate. Predictor variables are normalized to have mean 0 and standard deviation 1 so that the slope estimates are comparable. The response variable, macaque read depth, is not normalized. Standard errors of the slope estimates are in parentheses.

$p$  –  $p$ -value from a two-sided  $t$ -test with null  $\beta = 0$ .

Macaque mappability – The number of 76 bp simulated macaque reads uniquely mapped to each base in the human target sequence.

| Predictor                        | $\beta$         | $\beta^*$    | $p$ -value              |
|----------------------------------|-----------------|--------------|-------------------------|
| (Intercept)                      | 39.7 (1.21)     | 92.1 (0.13)  | $< 2.0 \times 10^{-16}$ |
| Human read depth (reads/base)    | 0.93 (0.0019)   | 67.2 (0.14)  | $< 2.0 \times 10^{-16}$ |
| Nucleotide differences (%)       | -7.72 (0.080)   | -13.3 (0.14) | $< 2.0 \times 10^{-16}$ |
| Indels (%)                       | -4.18 (0.22)    | -2.54 (0.13) | $< 2.0 \times 10^{-16}$ |
| Macaque mappability (reads/base) | -0.060 (0.0093) | -0.89 (0.14) | $8.46 \times 10^{-11}$  |
| GC content (%)                   | 7.10 (1.29)     | 0.80 (0.14)  | $3.87 \times 10^{-08}$  |

**Table S4. Genomic features of captured and not captured macaque targets.** We examined the following genomic features for the 155,707 human targets with best-reciprocal orthologs in the macaque genome: the number of nucleotide differences between human and macaque, the number of indel bases between human and macaque and the GC content. A target was considered “captured” if more than half of the human targeted bases were covered by at least one sequencing read.

|                      | <b>No. targets</b> | <b>No. bases</b> | <b>Differences (%)</b> | <b>Indel bases (%)</b> | <b>GC (%)</b> |
|----------------------|--------------------|------------------|------------------------|------------------------|---------------|
| Captured targets     | 154,596            | 29,479,474       | 3.07                   | 0.169                  | 49.9          |
| Not captured targets | 1,111              | 162,361          | 3.92                   | 0.500                  | 51.7          |



**Table S5. High quality coding sequence differences relative to the human reference genome.** Coding sequence differences relative to the human reference genome calculated from high quality ( $\geq Q40$ ) sequence for each assembled exome and for the non-human primate reference genomes of chimpanzee (panTro2), orangutan (ponAbe2) and rhesus macaque (rheMac2). Coding sequences are non-overlapping transcripts (longest transcript retained from overlapping transcripts) from the 20080430 version of the CCDS database (Pruitt et al. 2009) totaling 27,583,228 bp. 2,655,850 bp of this sequence was not targeted by our capture method and contributes to the difference between the number of assembled exome bases and the number of bases from the non-human primate reference genomes. Heterozygous sites and sites overlapping known segmental duplications were excluded from all species' sequences. Exons with excess heterozygosity, low read depth or more than half their sequence filtered were removed from the exome assemblies.

Common  $\geq Q40$  sites – 9,106,235 sites that are high quality in all species.

| Species | All sites                 |                             |                | Common $\geq Q40$ sites     |                |
|---------|---------------------------|-----------------------------|----------------|-----------------------------|----------------|
|         | $\geq Q40$ consensus (bp) | $\geq Q40$ differences (bp) | Difference (%) | $\geq Q40$ differences (bp) | Difference (%) |
| panTro2 | 23,904,584                | 128,495                     | 0.54           | 42,482                      | 0.47           |
| ponAbe2 | 23,139,970                | 329,972                     | 1.43           | 113,938                     | 1.25           |
| rheMac2 | 21,925,828                | 574,515                     | 2.62           | 204,446                     | 2.25           |
| Macaque | 17,459,375                | 439,792                     | 2.52           | 203,818                     | 2.24           |
| Vervet  | 18,185,119                | 465,882                     | 2.56           | 208,018                     | 2.28           |
| Colobus | 16,197,614                | 428,758                     | 2.65           | 213,885                     | 2.35           |
| Tamarin | 15,346,639                | 642,281                     | 4.19           | 353,732                     | 3.88           |

**Table S6. Summary of high quality coding indel lengths.** This table summarizes the number of indels with lengths that are multiples of three ( $3n$ ) in gene alignments that contain greater than 75% high quality sequence in all species. Low quality indels were only included if their read depth was sufficiently high ( $\geq 4$ ) or they were confirmed in another species. Indels less than 15 bp apart were combined to account for uncertainty in the alignment.

Gaps in human – regions of the alignments causing a gap in the human sequence; appears as an insertion in the other species.

Gaps in other species – regions of the alignments causing a gap in the other sequence; appears as a deletion in the other species.

| Species | Gaps in human |      |          | Gaps in other species |      |          |
|---------|---------------|------|----------|-----------------------|------|----------|
|         | Total         | $3n$ | $3n$ (%) | Total                 | $3n$ | $3n$ (%) |
| panTro2 | 152           | 121  | 79.6%    | 183                   | 123  | 67.2%    |
| ponAbe2 | 442           | 234  | 52.9%    | 471                   | 207  | 43.9%    |
| rheMac2 | 452           | 384  | 85.0%    | 487                   | 391  | 80.3%    |
| Macaque | 373           | 290  | 77.7%    | 417                   | 341  | 81.8%    |
| Vervet  | 376           | 309  | 82.2%    | 449                   | 357  | 79.5%    |
| Colobus | 359           | 295  | 82.2%    | 480                   | 370  | 77.1%    |
| Tamarin | 584           | 487  | 83.4%    | 904                   | 690  | 76.3%    |

**Table S7. Numbers of genes showing evidence of positive selection at several FDR thresholds.**

| <b>1% FDR</b> | <b>5% FDR</b> | <b>10% FDR</b> |
|---------------|---------------|----------------|
| 52            | 93            | 157            |

**Table S8. Complete list of genes tested for evidence of positive selection in primates ranked by significance.** Table is provided as a separate supplemental file. For each gene is shown the number of species, the nominal  $p$ -value from a chi-square approximated likelihood ratio test between CODEML's M7 and M8 models (Yang 2007), the estimated false discovery rate calculated by  $q$ -values (Storey and Tibshirani 2003) and the average  $F_{ST}$  (Tennessen et al. 2010).

dNdS\_REF – A '1' indicates a gene previously identified as subject to positive selection from the Rhesus Macaque Sequencing and Analysis Consortium (Rhesus Macaque Genome Sequencing and Analysis Consortium 2007), which used a similar  $d_N/d_S$  method and sequences from human, chimpanzee and macaque.

**Table S9. Genes identified by the Rhesus Macaque Genome Sequencing and Analysis Consortium, but not identified by our study.** Shown for each gene is the nominal  $p$ -value determined from a similar analysis using human, chimpanzee and macaque sequences (Rhesus Macaque Genome Sequencing and Analysis Consortium 2007) (\*), the nominal  $p$ -value and  $q$ -value (Storey and Tibshirani 2003) from our analysis and the number of species used in our analysis. Genes are ranked by their significance in the other study. The “Note” column indicates genes that were not tested in our analysis because we could not confidently obtain enough sequences (1), the models in CODEML did not converge (2), or they were not targeted by our probe set (3). In total, the other study identified 67 genes under positive selection at an FDR of 10%, 15 of which we also identified at the same FDR threshold.

| CCDS    | Gene name                               | Chr | $p$ -value* | $p$ -value | $q$ -value | No. species | Rank  | Note |
|---------|-----------------------------------------|-----|-------------|------------|------------|-------------|-------|------|
| 41683.1 | <i>KRTAP5-8</i>                         | 11  | 6.20E-16    | 7.45E-03   | 3.01E-01   | 3           | 361   |      |
| 42614.1 | <i>LILRB1</i>                           | 19  | 7.20E-14    |            |            | 1           |       | 1    |
| 11896.1 | <i>DSG1</i>                             | 18  | 1.10E-10    | 4.52E-03   | 2.33E-01   | 3           | 280   |      |
| 14217.1 | <i>MAGEB6</i>                           | X   | 5.30E-08    |            |            | 2           |       | 1    |
| 7831.1  | <i>MRGPRX4</i>                          | 11  | 5.60E-08    |            |            | 2           |       | 1    |
|         | <i>COL6A5</i><br>( <i>FLJ35880</i> )    | 3   | 1.70E-07    |            |            |             |       | 3    |
|         | <i>LOC442247</i>                        | 6   | 3.80E-07    |            |            |             |       | 3    |
| 5007.1  | <i>CGA</i>                              | 6   | 1.20E-06    | 1.01E-02   | 3.52E-01   | 7           | 408   |      |
|         | <i>KRTAP5-4</i>                         | 11  | 2.70E-06    |            |            |             |       | 3    |
| 12231.1 | <i>ICAM1</i>                            | 19  | 2.70E-06    | 2.24E-03   | 1.61E-01   | 5           | 201   |      |
|         | <i>NA_1024667</i>                       | 1   | 4.50E-06    |            |            |             |       | 3    |
|         | <i>CCDC45</i>                           | 17  | 4.90E-06    |            |            |             |       | 3    |
| 4931.1  | <i>CRISP1</i>                           | 6   | 1.60E-05    | 1.66E-03   | 1.33E-01   | 7           | 184   |      |
| 7973.1  | <i>FAM111A</i>                          | 11  | 2.80E-05    |            |            |             |       | 2    |
| 12891.1 | <i>LAIR1</i>                            | 19  | 3.10E-05    |            |            | 1           |       | 1    |
| 4854.1  | <i>TREM1</i>                            | 6   | 6.30E-05    |            |            |             |       | 2    |
| 7972.1  | <i>FAM111B</i>                          | 11  | 1.30E-04    | 4.52E-03   | 2.33E-01   | 3           | 285   |      |
| 3785.1  | <i>DCHS2</i><br>( <i>AK123368</i> )     | 4   | 1.30E-04    |            |            | 1           |       | 1    |
| 31672.1 | <i>C11orf87</i><br>( <i>LOC399947</i> ) | 11  | 1.30E-04    | 1.0        | 9.87E-01   | 7           | 8,821 |      |
| 31685.1 | <i>CD3E</i>                             | 11  | 1.30E-04    | 2.73E-02   | 5.79E-01   | 7           | 675   |      |
| 1385.1  | <i>CFH</i>                              | 1   | 1.50E-04    | 6.47E-03   | 2.87E-01   | 4           | 347   |      |
|         | <i>TCRA</i>                             | 14  | 1.50E-04    |            |            |             |       | 3    |
|         | <i>OTTHUMT00000004245</i>               | 1   | 1.50E-04    |            |            |             |       | 3    |

|         |                               |    |          |          |          |   |        |   |
|---------|-------------------------------|----|----------|----------|----------|---|--------|---|
| 6507.1  | <i>IFNA8</i>                  | 9  | 1.50E-04 | 9.07E-02 | 9.87E-01 | 6 | 1,276  |   |
|         | <i>TGOLN2</i>                 | 16 | 1.80E-04 |          |          |   |        | 3 |
| 31168.1 | <i>PDSSI</i>                  | 10 | 1.80E-04 | 3.33E-01 | 9.87E-01 | 7 | 2,811  |   |
| 7753.1  | <i>HBB</i>                    | 11 | 2.00E-04 | 5.49E-01 | 9.87E-01 | 5 | 3,919  |   |
| 7854.1  | <i>SLC6A5</i>                 | 11 | 2.30E-04 |          |          | 1 |        | 1 |
| 2717.1  | <i>ZNF197</i>                 | 3  | 3.40E-04 | 1.83E-02 | 4.83E-01 | 3 | 542    |   |
| 42475.1 | <i>ZNRF4</i>                  | 19 | 3.90E-04 | 8.19E-01 | 9.87E-01 | 4 | 5,813  |   |
| 33522.1 | <i>MRPL39</i>                 | 21 | 4.00E-04 | 4.0E-04  | 9.87E-01 | 6 | 12,698 |   |
| 5042.1  | <i>COQ3 (RP11-98I9.1-002)</i> | 6  | 4.00E-04 | 1.83E-01 | 9.87E-01 | 7 | 1,922  |   |
| 32792.1 | <i>CEP192 (AB051446)</i>      | 18 | 4.30E-04 |          |          | 1 |        | 1 |
| 31080.1 | <i>FAM36A</i>                 | 1  | 4.30E-04 | 1.66E-02 | 4.55E-01 | 4 | 528    |   |
| 33747.1 | <i>LTF</i>                    | 3  | 4.90E-04 | 3.03E-03 | 1.89E-01 | 4 | 226    |   |
|         | <i>CCDC129</i>                | 7  | 4.90E-04 |          |          |   |        | 3 |
| 2932.1  | <i>CPOX</i>                   | 3  | 4.90E-04 | 2.74E-03 | 1.81E-01 | 7 | 219    |   |
| 8840.1  | <i>KRT78</i>                  | 12 | 5.00E-04 | 9.05E-01 | 9.87E-01 | 7 | 6,635  |   |
| 5806.1  | <i>OPN1SW</i>                 | 7  | 5.80E-04 | 5.50E-02 | 8.33E-01 | 7 | 959    |   |
| 13983.1 | <i>APOBEC3C</i>               | 22 | 5.90E-04 | 2.24E-02 | 5.27E-01 | 5 | 623    |   |
|         | <i>RP1-321E8.3-001</i>        | X  | 6.00E-04 |          |          |   |        | 3 |
|         | <i>KIAA1731 (AB051518)</i>    | 11 | 6.80E-04 |          |          |   |        | 3 |
| 3419.1  | <i>FGFBP2 (KSP37)</i>         | 4  | 6.80E-04 | 3.33E-01 | 9.87E-01 | 6 | 2,750  |   |
| 3278.1  | <i>AHSG</i>                   | 3  | 6.90E-04 |          |          |   |        | 2 |
| 4470.1  | <i>HUS1B</i>                  | 6  | 6.90E-04 | 4.08E-02 | 7.17E-01 | 4 | 831    |   |
| 434.1   | <i>NDUFS5</i>                 | 1  | 7.10E-04 | 1.11E-02 | 3.71E-01 | 5 | 440    |   |
| 3143.1  | <i>TM4SF1</i>                 | 3  | 7.30E+04 | 6.74E-03 | 2.87E-01 | 7 | 346    |   |
|         | <i>ADAM32</i>                 | 8  | 7.60E-04 |          |          |   |        | 3 |
| 11799.1 | <i>DCXR</i>                   | 17 | 8.10E-04 | 1.11E-02 | 3.71E-01 | 7 | 433    |   |
| 5959.1  | <i>DEFB1</i>                  | 8  | 8.30E-04 | 1.11E-03 | 1.04E-01 | 7 | 158    |   |
| 35001.1 | <i>C9orf11</i>                | 9  | 8.30E-04 | 2.73E-01 | 9.87E-01 | 5 | 2,479  |   |
| 10276.1 | <i>C15orf39</i>               | 15 | 8.30E-04 | 3.68E-01 | 9.87E-01 | 6 | 3,022  |   |

**Table S10. GO categories enriched for genes predicted to be under positive selection.** 13,838 of 15,027 genes tested for positive selection were assigned to UniProt identifiers and used to identify GO categories enriched for genes predicted to be under positive selection. Shown are the numbers of genes assigned to each biological process category, the numbers of genes in a null distribution consisting of all genes except those assigned to the term being tested, the numbers of tests performed and the nominal *p*-values from a one-sided Mann-Whitney U test. Bolded *p*-values are significant after a conservative Bonferroni correction for multiple testing (*p*-value < 0.05). Only categories with a nominal *p*-value less than 0.05 are reported.

| GO ID      | Biological process                                       | No. tests | Genes in category | Genes in null | <i>p</i> -value |
|------------|----------------------------------------------------------|-----------|-------------------|---------------|-----------------|
| GO:0006952 | defense response                                         | 1,681     | 476               | 10,888        | <b>4.03E-14</b> |
| GO:0031424 | keratinization                                           | 1,526     | 36                | 10,412        | <b>3.50E-09</b> |
| GO:0007606 | sensory perception of chemical stimulus                  | 1,523     | 259               | 10,376        | <b>2.40E-08</b> |
| GO:0055114 | oxidation reduction                                      | 1,517     | 510               | 10,117        | 5.00E-05        |
| GO:0019882 | antigen processing and presentation                      | 1,445     | 33                | 9,607         | 7.80E-05        |
| GO:0046483 | heterocycle metabolic process                            | 1,441     | 227               | 9,574         | 7.96E-04        |
| GO:0015698 | inorganic anion transport                                | 1,364     | 41                | 9,347         | 6.76E-04        |
| GO:0030193 | regulation of blood coagulation                          | 1,363     | 24                | 9,306         | 8.76E-04        |
| GO:0044243 | multicellular organismal catabolic process               | 1,346     | 22                | 9,282         | 9.95E-04        |
| GO:0007586 | digestion                                                | 1,337     | 29                | 9,260         | 1.72E-03        |
| GO:0042254 | ribosome biogenesis                                      | 1,333     | 23                | 9,231         | 1.87E-03        |
| GO:0007283 | spermatogenesis                                          | 1,331     | 214               | 9,208         | 2.36E-03        |
| GO:0007600 | sensory perception                                       | 1,291     | 208               | 8,994         | 1.26E-03        |
| GO:0032368 | regulation of lipid transport                            | 1,270     | 24                | 8,786         | 2.22E-03        |
| GO:0050731 | positive regulation of peptidyl-tyrosine phosphorylation | 1,255     | 34                | 8,762         | 1.75E-03        |
| GO:0006974 | response to DNA damage stimulus                          | 1,219     | 247               | 8,728         | 3.28E-03        |
| GO:0006955 | immune response                                          | 1,177     | 137               | 8,481         | 4.95E-03        |
| GO:0008544 | epidermis development                                    | 1,146     | 69                | 8,344         | 7.06E-03        |
| GO:0009566 | fertilization                                            | 1,124     | 25                | 8,275         | 1.25E-02        |
| GO:0060249 | anatomical structure homeostasis                         | 1,121     | 45                | 8,250         | 1.72E-02        |
| GO:0032886 | regulation of microtubule-based process                  | 1,098     | 30                | 8,205         | 8.38E-03        |
| GO:0006869 | lipid transport                                          | 1,088     | 70                | 8,175         | 1.77E-02        |
| GO:0006725 | cellular aromatic compound metabolic process             | 1,076     | 23                | 8,105         | 1.14E-02        |
| GO:0022610 | biological adhesion                                      | 1,072     | 396               | 8,082         | 1.54E-02        |
| GO:0030198 | extracellular matrix organization                        | 1,028     | 36                | 7,686         | 4.17E-03        |
| GO:0031960 | response to corticosteroid stimulus                      | 1,016     | 45                | 7,650         | 9.87E-03        |

|            |                                                     |     |     |       |          |
|------------|-----------------------------------------------------|-----|-----|-------|----------|
| GO:0006732 | coenzyme metabolic process                          | 992 | 50  | 7,605 | 1.15E-02 |
| GO:0001775 | cell activation                                     | 983 | 75  | 7,555 | 2.01E-02 |
| GO:0010562 | positive regulation of phosphorus metabolic process | 966 | 36  | 7,480 | 1.33E-02 |
| GO:0008643 | carbohydrate transport                              | 937 | 39  | 7,444 | 1.74E-02 |
| GO:0034097 | response to cytokine stimulus                       | 931 | 31  | 7,405 | 1.70E-02 |
| GO:0007010 | cytoskeleton organization                           | 915 | 227 | 7,317 | 4.39E-02 |
| GO:0016042 | lipid catabolic process                             | 857 | 69  | 7,090 | 2.76E-02 |
| GO:0055085 | transmembrane transport                             | 849 | 343 | 7,021 | 4.65E-02 |



**Table S11. Genes assigned to the GO biological process category, “keratinization”, ranked by statistical evidence of positive selection.** Listed below are 36 of the 41 genes assigned to the “keratinization” category in GO (GO:0031424) that were tested for positive selection. The majority of these genes reside in a cluster on chromosome 1. Shown for each gene are the nominal  $p$ -value from a chi-square approximated likelihood ratio test between CODEML’s M7 and M8 models (Yang 2007), the corresponding  $q$ -value (Storey and Tibshirani 2003) and the overall rank. For the top 6 (bolded  $q$ -values), there is statistical evidence for positive selection at an FDR of 10%.

| CCDS    | Gene Name     | Chr | Description                              | No. Species | $p$ -value | $q$ -value      | Rank  |
|---------|---------------|-----|------------------------------------------|-------------|------------|-----------------|-------|
| 30866.1 | <i>SPRR2E</i> | 1   | small proline-rich protein 2E            | 7           | 1.13E-07   | <b>1.28E-04</b> | 13    |
| 30867.1 | <i>SPRR2F</i> | 1   | small proline-rich protein 2F            | 6           | 4.56E-07   | <b>3.98E-04</b> | 17    |
| 1030.1  | <i>IVL</i>    | 1   | involucrin                               | 4           | 6.81E-07   | <b>5.32E-04</b> | 19    |
| 1015.1  | <i>LCE3C</i>  | 1   | late cornified envelope 3C               | 6           | 2.04E-05   | <b>6.73E-03</b> | 44    |
| 30865.1 | <i>SPRR2B</i> | 1   | small proline-rich protein 2B            | 6           | 6.13E-05   | <b>1.62E-02</b> | 56    |
| 11737.1 | <i>EVPL</i>   | 17  | envoplakin                               | 7           | 3.71E-04   | <b>5.73E-02</b> | 95    |
| 1032.1  | <i>SPRR1A</i> | 1   | small proline-rich protein 1A            | 6           | 1.11E-03   | 1.04E-01        | 159   |
| 1020.1  | <i>LCE2B</i>  | 1   | late cornified envelope 2B               | 4           | 2.24E-03   | 1.61E-01        | 204   |
| 1033.1  | <i>SPRR3</i>  | 1   | small proline-rich protein 3             | 6           | 2.48E-03   | 1.70E-01        | 213   |
| 30870.1 | <i>LOR</i>    | 1   | loricrin                                 | 4           | 2.47E-02   | 5.56E-01        | 638   |
| 1031.1  | <i>SPRR4</i>  | 1   | small proline-rich protein 4             | 6           | 2.47E-02   | 5.56E-01        | 643   |
| 1021.1  | <i>LCE2A</i>  | 1   | late cornified envelope 2A               | 3           | 3.34E-02   | 6.50E-01        | 747   |
| 1014.1  | <i>LCE3D</i>  | 1   | late cornified envelope 3D               | 5           | 8.21E-02   | 9.87E-01        | 1,226 |
| 1026.1  | <i>LCE1C</i>  | 1   | late cornified envelope 1C               | 4           | 1.35E-01   | 9.87E-01        | 1,573 |
| 30864.1 | <i>SPRR2D</i> | 1   | small proline-rich protein 2D            | 6           | 1.65E-01   | 9.87E-01        | 1,825 |
| 33435.1 | <i>TGM3</i>   | 20  | transglutaminase 3                       | 7           | 2.02E-01   | 9.87E-01        | 1,974 |
| 1024.1  | <i>LCE1E</i>  | 1   | late cornified envelope 1E               | 5           | 3.01E-01   | 9.87E-01        | 2,595 |
| 10526.1 | <i>PPL</i>    | 16  | periplakin                               | 4           | 3.01E-01   | 9.87E-01        | 2,645 |
| 1034.1  | <i>SPRR2A</i> | 1   | small proline-rich protein 2A            | 6           | 4.07E-01   | 9.87E-01        | 3,208 |
| 1011.1  | <i>LCE5A</i>  | 1   | late cornified envelope 5A               | 4           | 4.49E-01   | 9.87E-01        | 3,392 |
| 30863.1 | <i>SPRR1B</i> | 1   | small proline-rich protein 1B (cornifin) | 6           | 4.49E-01   | 9.87E-01        | 3,393 |
| 8835.1  | <i>KRT2</i>   | 12  | keratin 2                                | 5           | 6.07E-01   | 9.87E-01        | 4,160 |
| 1025.1  | <i>LCE1D</i>  | 1   | late cornified envelope 1D               | 4           | 6.70E-01   | 9.87E-01        | 4,685 |

|         |                |    |                                       |   |          |          |        |
|---------|----------------|----|---------------------------------------|---|----------|----------|--------|
| 1019.1  | <i>LCE2C</i>   | 1  | late cornified envelope 2C            | 4 | 6.70E-01 | 9.87E-01 | 4,704  |
| 1017.1  | <i>LCE3A</i>   | 1  | late cornified envelope 3A            | 5 | 6.70E-01 | 9.87E-01 | 4,726  |
| 1016.1  | <i>LCE3B</i>   | 1  | late cornified envelope 3B            | 7 | 8.19E-01 | 9.87E-01 | 5,592  |
| 1013.1  | <i>LCE3E</i>   | 1  | late cornified envelope 3E            | 7 | 9.05E-01 | 9.87E-01 | 6,225  |
| 1018.1  | <i>LCE2D</i>   | 1  | late cornified envelope 2D            | 4 | 9.05E-01 | 9.87E-01 | 6,289  |
| 1027.1  | <i>LCE1B</i>   | 1  | late cornified envelope 1B            | 5 | 9.05E-01 | 9.87E-01 | 6,314  |
| 43777.1 | <i>SHARPIN</i> | 8  | SHANK-associated RH domain interactor | 4 | 9.05E-01 | 9.87E-01 | 6,650  |
| 9622.1  | <i>TGMI</i>    | 14 | transglutaminase 1                    | 6 | 1.0      | 9.87E-01 | 7,436  |
| 12606.1 | <i>CNFN</i>    | 19 | cornifelin                            | 6 | 1.0      | 9.87E-01 | 9,232  |
| 1023.1  | <i>LCE1F</i>   | 1  | late cornified envelope 1F            | 4 | 1.0      | 9.87E-01 | 9,754  |
| 30868.1 | <i>SPRR2G</i>  | 1  | small proline-rich protein 2G         | 5 | 1.0      | 9.87E-01 | 9,950  |
| 31777.1 | <i>PPHLN1</i>  | 12 | periphilin 1                          | 6 | 1.0      | 9.87E-01 | 10,567 |
| 1028.1  | <i>LCE1A</i>   | 1  | late cornified envelope 1A            | 3 | 1.0      | 9.87E-01 | 12,504 |

**Table S12. GO categories enriched for genes with increased human population differentiation.** The top ten GO categories enriched for genes under positive selection in primates were also tested for higher levels of population differentiation, as measured by  $F_{ST}$  between European and African populations (Tennessen et al. 2010). Shown are the number of genes assigned to each biological process category, the number of genes in a null distribution consisting of all genes except those assigned to the term being tested, the average  $F_{ST}$  for each group and the nominal  $p$ -values from a one-sided Mann-Whitney U test. Bolded  $p$ -values are significant after a Bonferroni correction for multiple testing ( $p$ -value < 0.05).

| GO ID      | Biological process                         | Genes in cat. | Genes in null | $F_{ST}$ in cat. | $F_{ST}$ in null | $p$ -value      |
|------------|--------------------------------------------|---------------|---------------|------------------|------------------|-----------------|
| GO:0006952 | defense response                           | 448           | 13,809        | 0.0778           | 0.0710           | 0.0161          |
| GO:0031424 | keratinization                             | 36            | 14,221        | 0.128            | 0.0711           | 0.0550          |
| GO:0007606 | sensory perception of chemical stimulus    | 253           | 14,004        | 0.0961           | 0.0708           | <b>2.97E-13</b> |
| GO:0055114 | oxidation reduction                        | 496           | 13,761        | 0.0840           | 0.0707           | <b>8.24E-04</b> |
| GO:0019882 | antigen processing and presentation        | 37            | 14,220        | 0.103            | 0.0711           | 0.0574          |
| GO:0015698 | inorganic anion transport                  | 41            | 14,216        | 0.0733           | 0.0712           | 0.394           |
| GO:0046483 | heterocycle metabolic process              | 259           | 13,998        | 0.0619           | 0.0714           | 0.858           |
| GO:0030193 | regulation of blood coagulation            | 35            | 14,222        | 0.0664           | 0.712            | 0.567           |
| GO:0044243 | multicellular organismal catabolic process | 23            | 14,234        | 0.0791           | 0.0712           | 0.0975          |
| GO:0007600 | sensory perception                         | 491           | 13,766        | 0.0837           | 0.0708           | <b>5.80E-07</b> |

**Table S13. Numbers of genes showing evidence for positive selection on lineages of the phylogeny.** Shown for each branch of the primate phylogeny (Figure 1A) are the sequences required to test that branch, the number of genes tested and the numbers of genes showing evidence for positive selection at several FDR thresholds and at a nominal  $p$ -value  $< 0.05$ .  $P$ -values were computed from a 50:50 mixture of a chi-square distribution with 1 degree of freedom and a point mass at 0 (Zhang et al. 2005). Note that the branch labeled as “tamarin” combines both the branch leading to tamarin as well as the branch leading to the common ancestor of Apes and Old World monkeys.

OWM – sequence required from any single Old World monkey: macaque (rheMac2), vervet or colobus.

APE – sequence required from any single Great Ape: human (hg18), chimpanzee (panTro2) or orangutan (ponAbe2).

| Branch                   | Sequences required                         | No. genes tested | No. significant genes |        |         |                     |
|--------------------------|--------------------------------------------|------------------|-----------------------|--------|---------|---------------------|
|                          |                                            |                  | 1% FDR                | 5% FDR | 10% FDR | $p$ -value $< 0.05$ |
| panTro2                  | panTro2, hg18, 1 other                     | 14,250           | 2                     | 3      | 6       | 203                 |
| hg18                     | hg18, panTro2, 1 other                     | 14,230           | 0                     | 0      | 0       | 254                 |
| panTro2, hg18            | panTro2, hg18, ponAbe2                     | 12,316           | 0                     | 5      | 6       | 256                 |
| ponAbe2                  | ponAbe2, hg18 or panTro2, 1 other          | 12,906           | 2                     | 4      | 8       | 338                 |
| panTro2, hg18, ponAbe2   | hg18 or panTro2, ponAbe2, 1 OWM, 1 other   | 8,863            | 3                     | 3      | 8       | 223                 |
| rheMac2                  | rheMac2, vervet, 1 other                   | 11,005           | 3                     | 4      | 4       | 173                 |
| vervet                   | vervet, rheMac2, 1 other                   | 11,003           | 1                     | 3      | 7       | 168                 |
| rheMac2, vervet          | rheMac2, vervet, colobus                   | 9,609            | 0                     | 0      | 0       | 126                 |
| colobus                  | colobus, rheMac2 or vervet, 1 other        | 10,695           | 2                     | 4      | 8       | 245                 |
| rheMac2, vervet, colobus | rheMac2 or vervet, colobus, 1 APE, tamarin | 9,018            | 5                     | 5      | 14      | 264                 |
| tamarin                  | tamarin, 1 OWM, 1 APE                      | 9,906            | 6                     | 12     | 84      | 708                 |

**Table S14. Complete lists of genes tested for evidence of positive selection acting on individual lineages ranked by significance.** Tables are provided as a separate supplemental file with a worksheet for each individual branch. For each gene are shown the number of species, the length of the sequence, the nominal  $p$ -value computed from a 50:50 mixture of a chi-square distribution with 1 degree of freedom and a point mass at 0 (Zhang et al. 2005) and the estimated false discovery rate calculated by  $q$ -values (Storey and Tibshirani 2003).

**Table S15. Top 5 GO categories enriched for genes predicted to be under lineage specific positive selection for each lineage.** Genes were assigned to UniProt identifiers and used to identify GO categories enriched for genes predicted to be under positive selection along specific lineages. Shown are the number of genes assigned to each biological process category, the number of genes in a null distribution consisting of all genes except those assigned to the term being tested, the number of tests performed and the nominal *p*-values from a one-sided Mann-Whitney U test. Bolded *p*-values are significant after a conservative Bonferroni correction for multiple testing (*p*-value < 0.05).

| GO ID                         | Biological process                                   | No. tests | Genes in category | Genes in null | <i>p</i> -value |
|-------------------------------|------------------------------------------------------|-----------|-------------------|---------------|-----------------|
| <b>panTro2</b>                |                                                      |           |                   |               |                 |
| GO:0007606                    | sensory perception of chemical stimulus              | 1,651     | 189               | 10,348        | <b>1.45E-14</b> |
| GO:0050900                    | leukocyte migration                                  | 1,644     | 50                | 10,159        | <b>8.42E-06</b> |
| GO:0031424                    | keratinization                                       | 1,606     | 35                | 10,109        | 5.74E-05        |
| GO:0006323                    | DNA packaging                                        | 1,603     | 23                | 10,074        | 8.18E-05        |
| GO:0044242                    | cellular lipid catabolic process                     | 1,602     | 70                | 10,051        | 5.38E-04        |
| <b>hg18</b>                   |                                                      |           |                   |               |                 |
| GO:0007606                    | sensory perception of chemical stimulus              | 1,648     | 188               | 10,329        | <b>1.59E-12</b> |
| GO:0000723                    | telomere maintenance                                 | 1,640     | 24                | 10,141        | 1.00E-03        |
| GO:0022411                    | cellular component disassembly                       | 1,632     | 32                | 10,117        | 1.13E-03        |
| GO:0031424                    | keratinization                                       | 1,628     | 34                | 10,085        | 2.39E-03        |
| GO:0007126                    | meiosis                                              | 1,625     | 54                | 10,051        | 5.14E-03        |
| <b>panTro2, hg18</b>          |                                                      |           |                   |               |                 |
| GO:0006952                    | defense response                                     | 1,538     | 383               | 8,968         | <b>7.22E-08</b> |
| GO:0007276                    | gamete generation                                    | 1,405     | 203               | 8,585         | <b>2.11E-07</b> |
| GO:0031424                    | keratinization                                       | 1,366     | 31                | 8,382         | 6.60E-05        |
| GO:0006120                    | mitochondrial electron transport, NADH to ubiquinone | 1,363     | 31                | 8,351         | 1.05E-04        |
| GO:0007606                    | sensory perception of chemical stimulus              | 1,361     | 97                | 8,320         | 8.06E-04        |
| <b>ponAbe2</b>                |                                                      |           |                   |               |                 |
| GO:0007608                    | sensory perception of smell                          | 1,566     | 103               | 9,374         | <b>1.43E-13</b> |
| GO:0031424                    | keratinization                                       | 1,558     | 32                | 9,271         | <b>1.10E-07</b> |
| GO:0042742                    | defense response to bacterium                        | 1,554     | 82                | 9,239         | 5.27E-05        |
| GO:0031214                    | biomineral tissue development                        | 1,500     | 23                | 9,157         | 7.43E-03        |
| GO:0010562                    | positive regulation of phosphorus metabolic process  | 1,496     | 107               | 9,134         | 1.14E-02        |
| <b>panTro2, hg18, ponAbe2</b> |                                                      |           |                   |               |                 |
| GO:0006952                    | defense response                                     | 1,313     | 263               | 6,645         | <b>1.47E-06</b> |
| GO:0006818                    | hydrogen transport                                   | 1,212     | 35                | 6,382         | 1.08E-03        |
| GO:0050866                    | negative regulation of cell activation               | 1,204     | 28                | 6,347         | 1.60E-03        |
| GO:0051606                    | detection of stimulus                                | 1,172     | 51                | 6,319         | 1.50E-03        |

|                                 |                                                                                                 |       |     |       |                 |
|---------------------------------|-------------------------------------------------------------------------------------------------|-------|-----|-------|-----------------|
| GO:0046942                      | carboxylic acid transport                                                                       | 1,159 | 81  | 6,268 | 1.48E-03        |
| <b>rheMac2</b>                  |                                                                                                 |       |     |       |                 |
| GO:0022904                      | respiratory electron transport chain                                                            | 1,464 | 32  | 8,182 | <b>5.40E-10</b> |
| GO:2000021                      | regulation of ion homeostasis                                                                   | 1,457 | 47  | 8,150 | <b>1.55E-05</b> |
| GO:0006952                      | defense response                                                                                | 1,395 | 355 | 8,103 | 5.94E-05        |
| GO:0007606                      | sensory perception of chemical stimulus                                                         | 1,296 | 102 | 7,748 | 3.89E-05        |
| GO:0006399                      | tRNA metabolic process                                                                          | 1,292 | 79  | 7,646 | 9.01E-04        |
| <b>vervet</b>                   |                                                                                                 |       |     |       |                 |
| GO:0007608                      | sensory perception of smell                                                                     | 1,463 | 84  | 8,180 | <b>1.63E-06</b> |
| GO:0006120                      | mitochondrial electron transport, NADH to ubiquinone                                            | 1,459 | 22  | 8,096 | <b>1.75E-05</b> |
| GO:0006952                      | defense response                                                                                | 1,457 | 368 | 8,074 | 6.12E-04        |
| GO:0007205                      | activation of protein kinase C activity by G-protein coupled receptor protein signaling pathway | 1,337 | 21  | 7,706 | 5.72E-04        |
| GO:0000075                      | cell cycle checkpoint                                                                           | 1,322 | 57  | 7,685 | 1.75E-03        |
| <b>rheMac2, vervet</b>          |                                                                                                 |       |     |       |                 |
| GO:0006952                      | defense response                                                                                | 1,366 | 321 | 7,167 | <b>4.52E-06</b> |
| GO:0015698                      | inorganic anion transport                                                                       | 1,264 | 35  | 6,846 | 1.37E-03        |
| GO:0006935                      | chemotaxis                                                                                      | 1,259 | 55  | 6,811 | 2.26E-03        |
| GO:0018130                      | heterocycle biosynthetic process                                                                | 1,230 | 37  | 6,756 | 2.84E-03        |
| GO:0050818                      | regulation of coagulation                                                                       | 1,212 | 20  | 6,719 | 5.20E-03        |
| <b>colobus</b>                  |                                                                                                 |       |     |       |                 |
| GO:0007606                      | sensory perception of chemical stimulus                                                         | 1,426 | 98  | 7,958 | <b>3.50E-06</b> |
| GO:0003018                      | vascular process in circulatory system                                                          | 1,419 | 29  | 7,860 | 1.15E-03        |
| GO:0006968                      | cellular defense response                                                                       | 1,401 | 32  | 7,831 | 1.48E-03        |
| GO:0043038                      | amino acid activation                                                                           | 1,397 | 32  | 7,799 | 1.45E-03        |
| GO:0048609                      | reproductive process in a multicellular organism                                                | 1,394 | 230 | 7,767 | 1.61E-03        |
| <b>rheMac2, vervet, colobus</b> |                                                                                                 |       |     |       |                 |
| GO:0006952                      | defense response                                                                                | 1,326 | 265 | 6,774 | <b>9.5E-08</b>  |
| GO:0042129                      | regulation of T cell proliferation                                                              | 1,223 | 22  | 6,509 | 2.30E-04        |
| GO:0007586                      | digestion                                                                                       | 1,197 | 20  | 6,487 | 2.78E-03        |
| GO:0071103                      | DNA conformation change                                                                         | 1,187 | 28  | 6,467 | 3.11E-03        |
| GO:0009451                      | RNA modification                                                                                | 1,183 | 27  | 6,439 | 2.96E-03        |
| <b>tamarin</b>                  |                                                                                                 |       |     |       |                 |
| GO:0006955                      | immune response                                                                                 | 1,380 | 245 | 7,436 | <b>6.32E-10</b> |
| GO:0006631                      | fatty acid metabolic process                                                                    | 1,291 | 133 | 7,191 | <b>9.10E-07</b> |
| GO:0007155                      | cell adhesion                                                                                   | 1,232 | 349 | 7,058 | <b>8.72E-06</b> |
| GO:0031099                      | regeneration                                                                                    | 1,175 | 40  | 6,709 | 1.80E-04        |
| GO:0001775                      | cell activation                                                                                 | 1,151 | 80  | 6,669 | 1.25E-04        |

**Table S16. Sequence coverage of captured miRNAs.** Summary of targeted miRNA sequence coverage for each non-human primate exome and two human HapMap exomes (Human 1: NA12879 and Human 2: NA18967). The total size of the captured miRNA target is 48,075 bp and includes ~550 miRNAs. Listed for each exome are the number of bases in the target covered by at least one read, the number of bases assembled and the number of bases assembled with Phred consensus quality score  $\geq 40$  (Q40;  $10^{-4}$  error rate).

| Sample  | $\geq 1X$<br>coverage<br>(bp) | $\geq 1X$<br>coverage<br>(%) | Consensus<br>called<br>(bp) | Consensus<br>called<br>(%) | $\geq Q40$<br>consensus<br>(bp) | $\geq Q40$<br>consensus<br>(%) | Avg.<br>coverage |
|---------|-------------------------------|------------------------------|-----------------------------|----------------------------|---------------------------------|--------------------------------|------------------|
| Human 1 | 43,530                        | 90.6                         | 42,995                      | 89.4                       | 42,336                          | 88.1                           | 91X              |
| Human 2 | 43,585                        | 90.7                         | 43,312                      | 90.1                       | 42,297                          | 88.0                           | 102X             |
| Macaque | 42,086                        | 87.5                         | 40,815                      | 84.9                       | 39,732                          | 82.6                           | 94X              |
| Vervet  | 42,579                        | 88.6                         | 41,022                      | 85.3                       | 40,063                          | 83.3                           | 93X              |
| Colobus | 41,530                        | 86.4                         | 39,955                      | 83.1                       | 38,730                          | 80.6                           | 88X              |
| Tamarin | 41,278                        | 85.9                         | 39,070                      | 81.3                       | 36,860                          | 76.7                           | 84X              |



**Table S17. Nucleotide differences and indels between the assembled macaque exome and the macaque reference genome.** We calculated the number of nucleotide differences and indels between our assembled macaque targeted sequences and the macaque reference genome for the 153,546 assembled targets that uniquely mapped to the macaque genome using cross\_match (v1.090518, <http://www.phrap.org>). Targets are further categorized by whether they are retained or removed following filtering for segmental duplications, low read depth, extreme heterozygosity and missing sequence (see Methods for more details), and by whether they were putative paralogous targets (see Figure S3). Note that the percent difference for all targets is higher than that reported in the main text (0.253% vs. 0.10%) because we used all captured targets which include flanking intronic and miRNA sequences in addition to coding sequences.

|                            | <b>No. targets</b> | <b>No. bases</b> | <b>Differences (%)</b> | <b>Indels (%)</b> |
|----------------------------|--------------------|------------------|------------------------|-------------------|
| All targets                | 153,546            | 27,746,320       | 0.253                  | 0.0252            |
| All retained targets       | 122,411            | 22,921,623       | 0.228                  | 0.0187            |
| All removed targets        | 31,135             | 4,824,697        | 0.376                  | 0.0560            |
| Putative paralogs          | 121                | 21,789           | 1.55                   | 0.142             |
| Putative retained paralogs | 89                 | 16,100           | 1.07                   | 0.118             |
| Putative removed paralogs  | 32                 | 5,689            | 2.90                   | 0.211             |

**Table S18. GO categories enriched for genes that are absent from the macaque exome assembly.** 15,827 of 16,707 genes were assigned to UniProt identifiers and used to identify GO categories enriched for genes that are absent from the macaque exome assembly. Shown for each category is the number of genes absent and present in that category, the number of genes absent and present excluding genes in that category and the *p*-value and odds ratio (OR) from a one-sided Fisher's exact test. Bolded *p*-values are significant after a conservative Bonferroni correction for multiple testing (*p*-value < 0.05). Only categories with a nominal *p*-value less than 0.05 are reported.

| GO ID      | Biological process                                  | No. tests | Cat. absent genes | Cat. present genes | Absent genes | Present genes | <i>p</i> -value | OR   |
|------------|-----------------------------------------------------|-----------|-------------------|--------------------|--------------|---------------|-----------------|------|
| GO:0007608 | sensory perception of smell                         | 2,130     | 146               | 213                | 2,775        | 9,470         | <b>5.3E-14</b>  | 2.34 |
| GO:0006355 | regulation of transcription, DNA dependent          | 2,121     | 681               | 1632               | 2,629        | 9,257         | <b>5.2E-14</b>  | 1.47 |
| GO:0031424 | keratinization                                      | 1,688     | 21                | 19                 | 1,948        | 7,625         | <b>7.1E-06</b>  | 4.33 |
| GO:0034340 | response to type I interferon                       | 1,683     | 22                | 22                 | 1,927        | 7,606         | <b>1.1E-05</b>  | 3.95 |
| GO:0016339 | calcium-dependent cell-cell adhesion                | 1,674     | 11                | 9                  | 1,905        | 7,584         | 5.9E-04         | 4.86 |
| GO:0007586 | digestion                                           | 1,669     | 20                | 31                 | 1,894        | 7,575         | 1.3E-03         | 2.58 |
| GO:0006952 | defense response                                    | 1,662     | 120               | 344                | 1,874        | 7,544         | 1.4E-03         | 1.40 |
| GO:0048609 | multicellular organismal reproductive process       | 1,522     | 77                | 204                | 1,754        | 7,200         | 1.1E-03         | 1.55 |
| GO:0034728 | nucleosome organization                             | 1,462     | 23                | 40                 | 1,677        | 6,996         | 1.2E-03         | 2.40 |
| GO:0031023 | microtubule organizing center organization          | 1,457     | 12                | 16                 | 1,654        | 6,956         | 3.6E-03         | 3.15 |
| GO:0051258 | protein polymerization                              | 1,455     | 15                | 23                 | 1,642        | 6,940         | 3.0E-03         | 2.76 |
| GO:0006275 | regulation of DNA replication                       | 1,445     | 15                | 27                 | 1,627        | 6,917         | 8.5E-03         | 2.36 |
| GO:0070507 | regulation of microtubule cytoskeleton organization | 1,434     | 12                | 19                 | 1,612        | 6,890         | 8.4E-03         | 2.70 |
| GO:0042384 | cilium assembly                                     | 1,423     | 9                 | 13                 | 1,600        | 6,871         | 1.4E-02         | 2.97 |
| GO:0016579 | protein deubiquitination                            | 1,417     | 10                | 16                 | 1,591        | 6,858         | 1.6E-02         | 2.69 |
| GO:0006351 | transcription, DNA-dependent                        | 1,414     | 32                | 85                 | 1,581        | 6,842         | 1.6E-02         | 1.63 |
| GO:0003013 | circulatory system process                          | 1,399     | 17                | 37                 | 1,549        | 6,757         | 1.7E-02         | 2.00 |
| GO:0034470 | ncRNA processing                                    | 1,374     | 14                | 122                | 1,532        | 6,720         | 1.7E-02         | 1.51 |
| GO:0050909 | sensory perception of taste                         | 1,362     | 11                | 21                 | 1,490        | 6,598         | 2.4E-02         | 2.32 |
| GO:0007275 | multicellular organismal development                | 1,357     | 73                | 254                | 1,479        | 6,577         | 4.4E-02         | 1.28 |

|            |                  |       |    |    |       |       |         |      |
|------------|------------------|-------|----|----|-------|-------|---------|------|
| GO:0007565 | female pregnancy | 1,308 | 11 | 24 | 1,406 | 6,323 | 4.2E-02 | 2.06 |
|------------|------------------|-------|----|----|-------|-------|---------|------|

## Supplemental Text

### **Text S1. Identification of paralogous sequences and evaluation of their impact on exome assemblies.**

Genes that have duplicated to become paralogs in other lineages are susceptible to mis-assembly because reads from multiple genomic locations may map to a single location in the human genome. To identify problematic paralogous targets we mapped macaque reads to both the human (hg18) and macaque (rheMac2) reference genomes. We then compared the depth of human target sequences to that of 155,707 orthologous target sequences in the macaque genome. As putative paralogs, we identified 137 targets with substantially higher read depth in human compared to macaque (Figure S3A).

To evaluate the impact these putative paralogous targets have on the macaque exome assembly, we compared assembled target sequences to the macaque reference genome sequence. Targets that are mis-assembled will have more nucleotide differences and indels compared to correctly assembled targets (which will have some differences due to polymorphisms in macaque). The assembled putative paralogous targets have a ~6-fold increase in the number of nucleotide differences (1.6% vs. 0.25%) and indels (0.14% vs. 0.025%) compared to the entire set of assembled targets (Table S17 and Figure S3B). This indicates that the putative paralogous targets are enriched for mis-assembled sequences.

We performed several post-assembly filtering steps to reduce the amount of mis-assembled sequences from paralogs, such as removing targets that overlap known segmental duplications or that have high levels of heterozygosity. The targets that are removed by filtering have a higher proportion of nucleotide differences (0.38% vs. 0.23%) and indels (0.056% vs. 0.019%) compared to those that are retained. For the subset of targets that are putative paralogs, filtering reduces the proportion of nucleotide differences (from 2.9% to 1.1%) and indels (from 0.21% to 0.12%) (Table S17 and Figure S2B). This demonstrates that our filtering steps remove targets that are more

likely to have assembly errors. The nucleotide differences for the retained putative paralogs remain high, however, suggesting that a small fraction of our final exome assemblies contain paralogous assembly errors.

## **Text S2. Types of genes absent from positive selection analyses.**

To better understand the types of genes that failed to capture, assemble or pass filters, we labeled human genes with macaque orthologs as “absent” if they had no macaque sequence following filtering. We then identified gene ontology (GO) terms that were enriched for absent genes (Table S18). The GO terms with the most significant enrichments are “sensory perception of smell” and “regulation of transcription, DNA-dependent”. This may indicate that genes in large families (such as olfactory receptors or zinc-finger transcription factors) are difficult to assemble or are preferentially removed by our filtering procedure. Another of the most significant categories, “keratinization”, is also enriched for genes predicted to be under positive selection (Table S9), suggesting that some rapidly evolving genes may be excluded from our analysis.

We checked whether any of the GO terms enriched for absent genes are related to immune response or reproduction, because genes involved in these processes are known to be rapidly evolving. The terms “response to type I interferon”, “defense response” and “multicellular organismal reproductive success” are enriched for absent genes, but only the first category is significant after Bonferroni correction for the number of tests performed (Table S18). These results indicate some fraction of rapidly evolving genes may be excluded from our positive selection analysis, but most are likely to be retained.

## Supplemental References

- Pruitt KD, Harrow J, Harte RA, Wallin C, Diekhans M, Maglott DR, Searle S, Farrell CM, Loveland JE, Ruef BJ et al. 2009. The consensus coding sequence (CCDS) project: Identifying a common protein-coding gene set for the human and mouse genomes. *Genome Res* **19**: 1316-1323.
- Rhesus Macaque Genome Sequencing and Analysis Consortium. 2007. Evolutionary and biomedical insights from the rhesus macaque genome. *Science* **316**: 222-234.
- Storey JD, Tibshirani R. 2003. Statistical significance for genomewide studies. *Proc Natl Acad Sci USA* **100**: 9440-9445.
- Tennessen JA, Madeoy J, Akey JM. 2010. Signatures of positive selection apparent in a small sample of human exomes. *Genome Research* **20**: 1327-1334.
- Yang Z. 2007. PAML 4: phylogenetic analysis by maximum likelihood. *Mol Biol Evol* **24**: 1586-1591.
- Zhang J, Nielsen R, Yang Z. 2005. Evaluation of an improved branch-site likelihood method for detecting positive selection at the molecular level. *Mol Biol Evol* **22**: 2472-2479.
